# Supplementary material for: Functionalization of Plasma Electrolytic Oxidation/Sol–Gel Coatings on AZ31 with Organic Corrosion Inhibitors
Source: MDPI journal article supplement (doi:10.3390/coatings14010084), 2024-01-07
Supplement: s1 [file s1]

**Table S1.** Kinetic laws, with and without inhibitor, calculated from hydrogen measurements.

| Inhibitor species            | [I] (M) | NaCl<br>(wt.%) | pH | b <sub>cr</sub><br>(mL cm <sup>-2</sup> d <sup>-1</sup> ) | Formula                                                                               |
|------------------------------|---------|----------------|----|-----------------------------------------------------------|---------------------------------------------------------------------------------------|
| NaCl (reference)             | 0.05    | 0.5            | 8  | 0.21                                                      |                                                                                       |
| 8-Hydroxyquinoline           | 0.05    | 0.5            | 8  | 0.02                                                      | 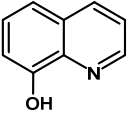   |
| Dodecylbenzenesulphonic acid | 0.05    | 0.5            | 8  | 0.05                                                      |    |
| Fumaric acid                 | 0.05    | 0.5            | 8  | 0.11                                                      |    |
| 5-Methyl-2-nitrobenzoic acid | 0.05    | 0.5            | 8  | 0.03                                                      |    |
| 4-Isopropilicbenzoic acid    | 0.05    | 0.5            | 8  | 0.32                                                      |    |
| 3-Methylsalycilic acid       | 0.05    | 0.5            | 8  | 0.03                                                      |   |
| Quinaldic acid               | 0.05    | 0.5            | 8  | 0.16                                                      |  |
| 2-Hydroxy-1,4-napothoquinone | 0.05    | 0.5            | 8  | 1.29                                                      |  |
| 4-Methyl-3-salycilic acid    | 0.05    | 0.5            | 8  | 1.02                                                      |  |

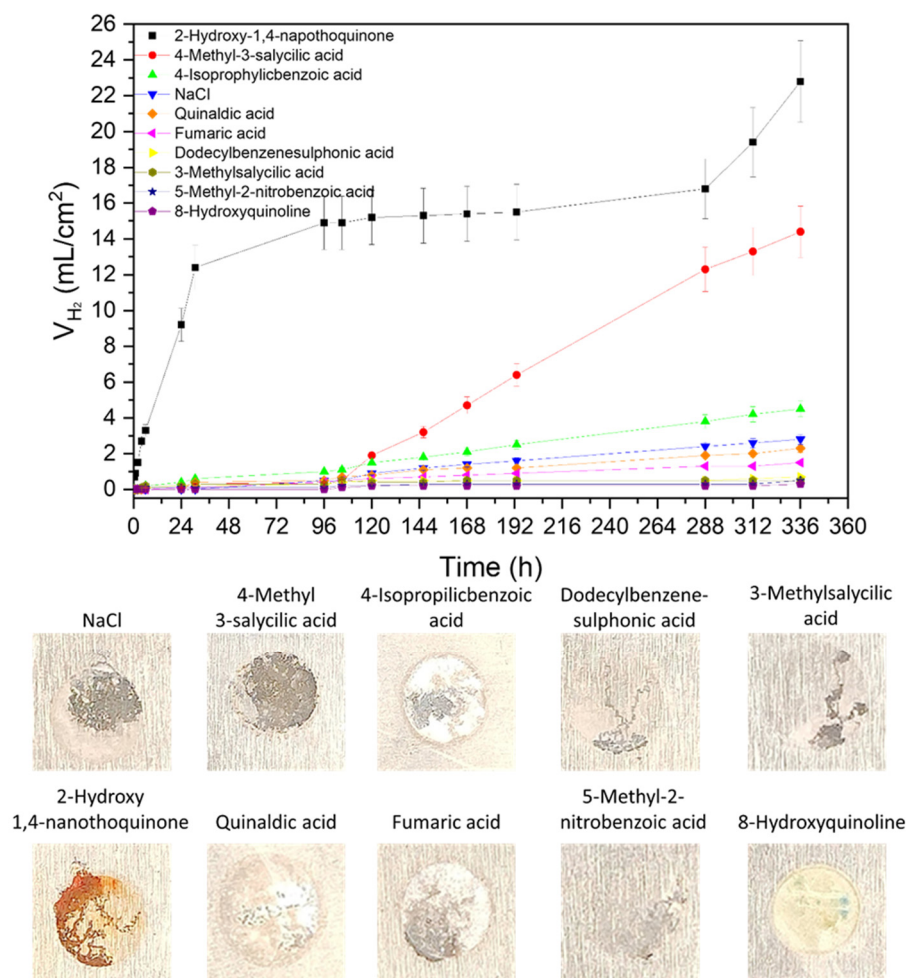

**Figure S1.** Volume of hydrogen evolved from the cathodic reaction during immersion in 0.5 wt.% NaCl solution and surface appearance of the exposed area after the test.

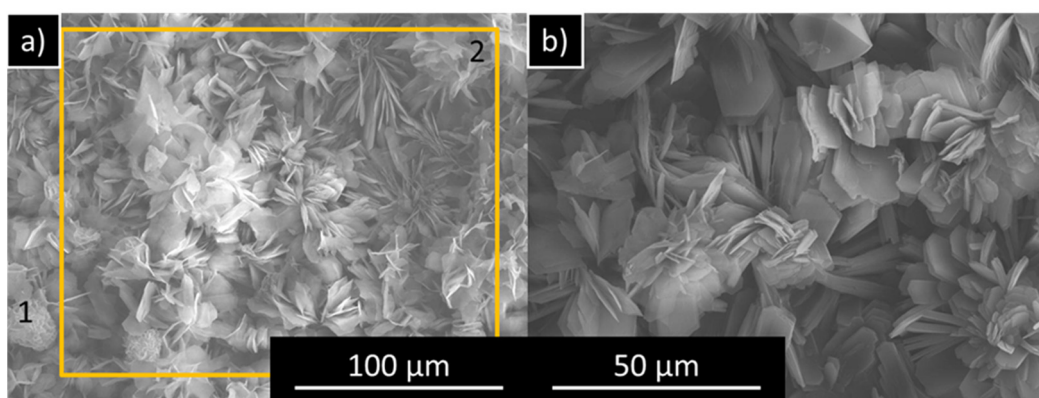

**Figure S2.** (a) Surface morphology of bare AZ31 exposed to 0.5 wt.% NaCl containing 8HQ after 14 days. A higher magnification view of the flakes is presented in (b). Marked areas corresponds to the EDS analysis collected in Table S2.

**Table S2.** Results of the local EDS surface analysis of the coatings (at.%).

|          | <b>C</b> | <b>O</b> | <b>Na</b> | <b>Mg</b> | <b>Al</b> | <b>Cl</b> | <b>Zn</b> |
|----------|----------|----------|-----------|-----------|-----------|-----------|-----------|
| <b>1</b> | 76.3     | 20.7     | 0.1       | 2.6       | 0.1       | 0.1       | 0.1       |
| <b>2</b> | 78.0     | 16.9     | 0.2       | 4.6       | 0.1       | –         | 0.1       |

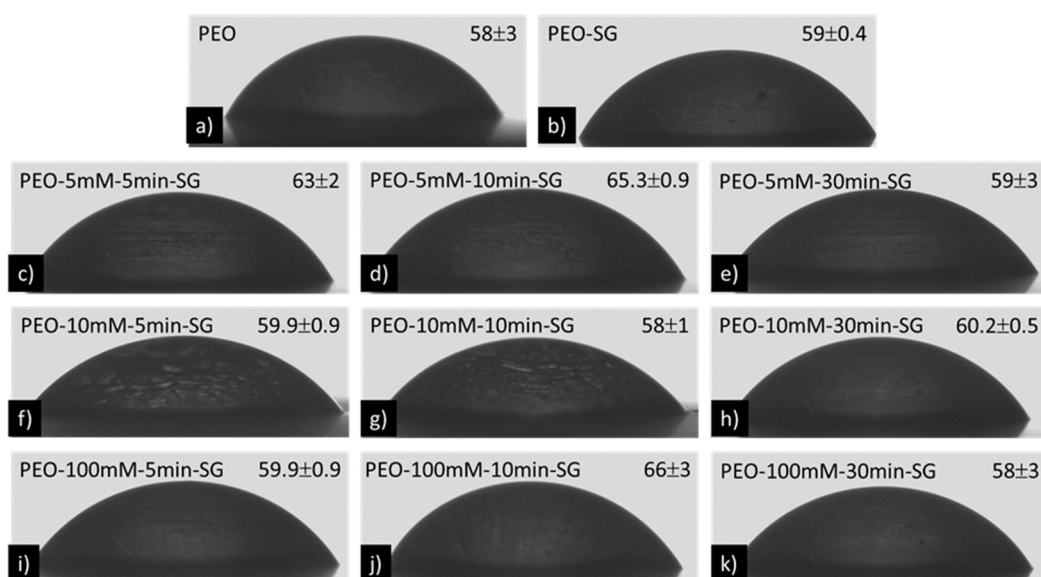

**Figure S3.** Water contact angle measurements: (a) PEO, (b) PEO-SG and (c-k) PEO-8HQ-SG.
